# Supplementary material
Source: PubMed Central journal article supplement (PMC3027161)
Supplement: supp_tpc.110.078972_Supplemental_Figures.pdf [file supp_tpc.110.078972_Supplemental_Figures.pdf]

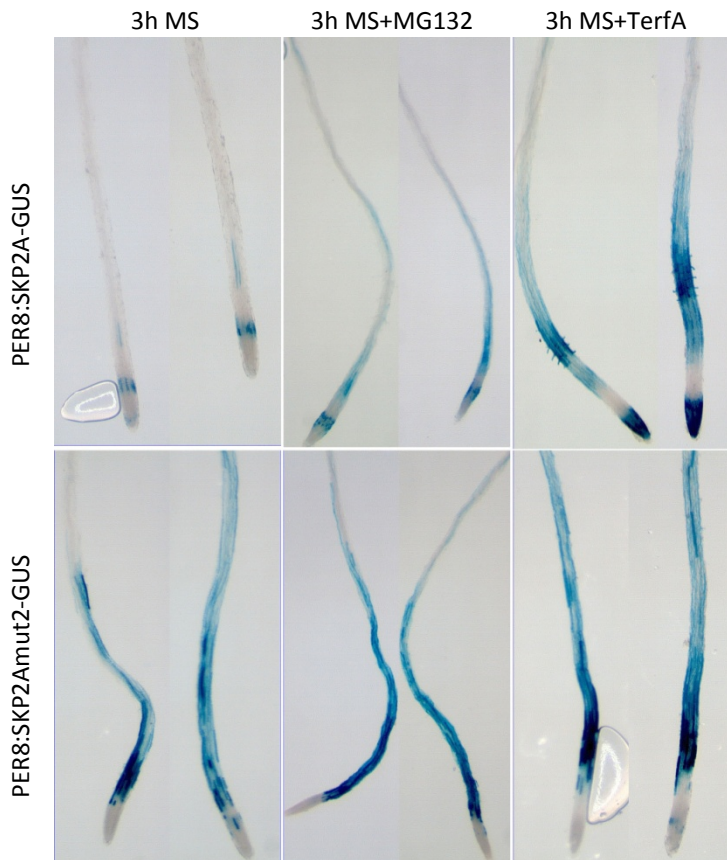

**Supplemental Figure 1. SKP2A-GUS protein accumulated in response to the proteasome inhibitor MG132 or Terfestatin A (TerfA).**

Five days old pER8:SKP2A-GUS and pER8:SKP2Amut2-GUS transgenic seedlings were transferred to MS plates containing 15  $\mu$ M of estradiol to induce the expression of the chimeric proteins during 16 hours. After induction, these seedlings were incubated during 3 hours in a MS medium alone (3h MS) or containing 40  $\mu$ M of MG132 (3h MG132) or 50  $\mu$ M of Terfestatin A (3h MS+TerfA) and then stained for GUS activity. Bar scale corresponds to 1 mm.

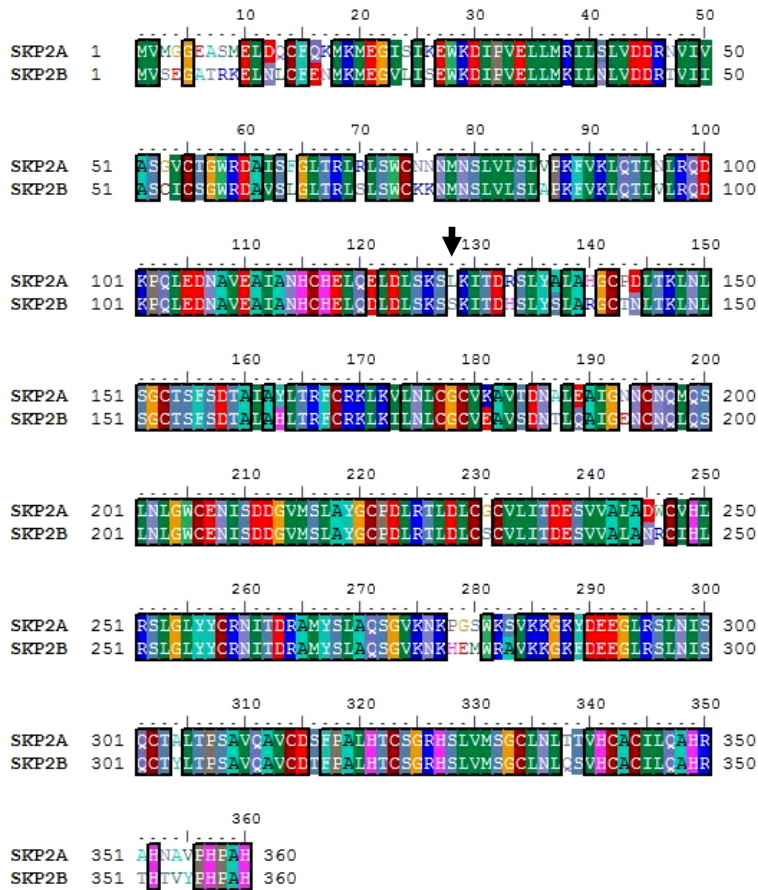

**Supplemental Figure 2. Alignment of SKP2A and SKP2B protein sequences.**

Arrow indicates the position 128 that corresponds to a leucine in SKP2A and to a serine in SKP2B.

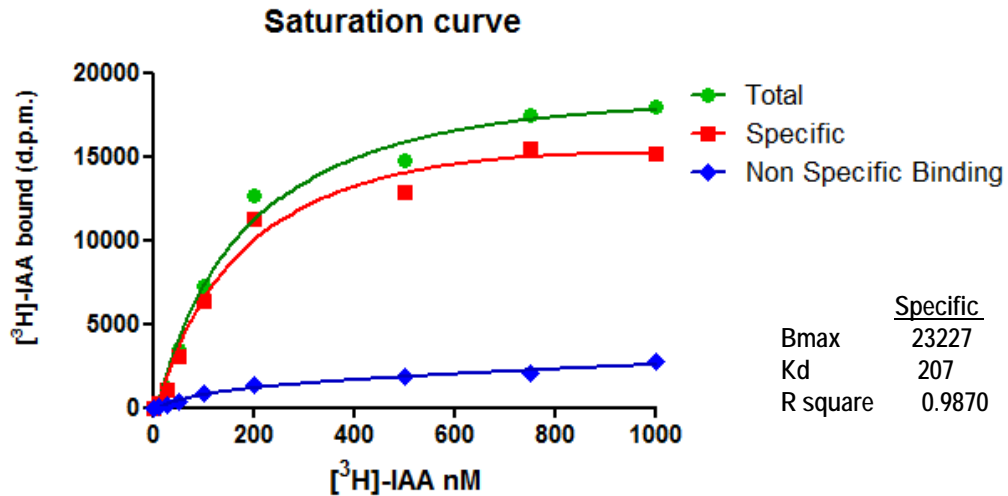

**Supplemental Figure 3. Scatchard analysis.**

Pull-down reactions were carried out with MBP-SKP2A in the presence of 25, 50, 75, 100, 200, 500, 750 or 1000 nM [<sup>3</sup>H]-IAA. The retained [<sup>3</sup>H]-IAA in the amylose beads after three washes was measured by scintillation counting. Each value is the mean of three independent measures. To determinate the non-specific binding (NSB), similar experiments were carried out with 100 μM of cold IAA. The Specific binding was calculated by subtracting the NSB from the total. The Kd, B-maxima and R square were calculated using nonlinear regression analyses using the Graph Pad Prism5 software.

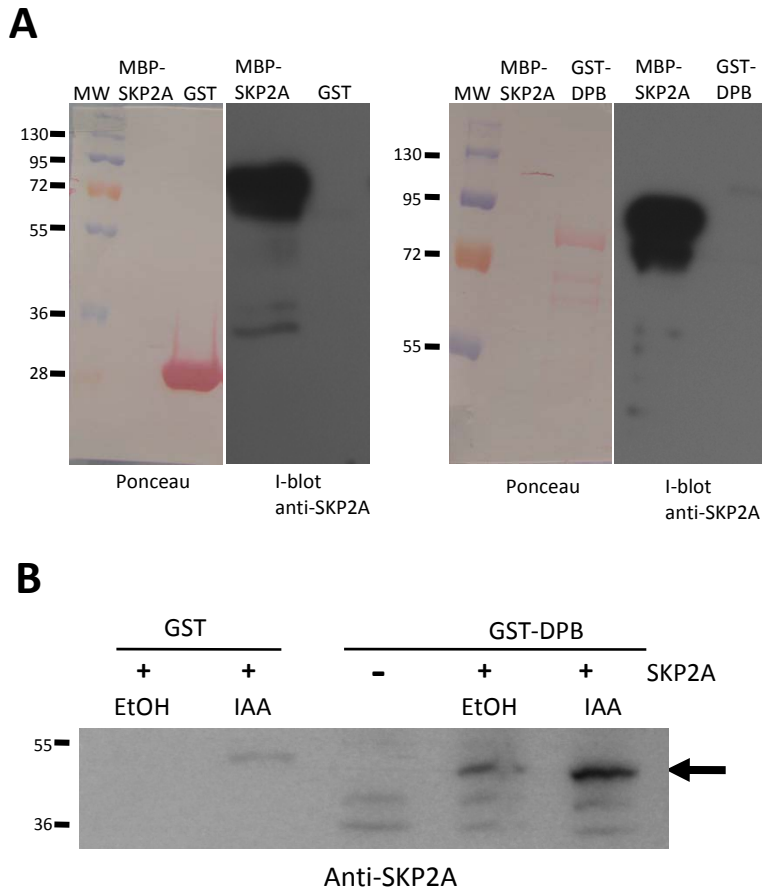

**Supplemental Figure 4. SKP2A interacts with DPB *in vitro*.**

**A)** Anti-SKP2A does not recognize the GST or GST-DPB proteins. The MBP-SKP2A (0,01 µg), GST (4 µg) or GST-DPB (1 µg) were separated in s SDS-PAGE and analyzed by immunoblotting (I-blot) with affinity purified IgGs anti-SKP2A. Arrow indicates the MBP-SKP2A. MW is molecular weight.

**B)** GST-DPB, but not GST, also interacts with His-SKP2A. To check that the interaction showed between GST-DPB and MBP-SKP2A was not due to the presence of the MBP tag in the protein, we constructed a version of 6x-histidine tag of SKP2A using the pQE system (Qiagen) that was expressed in bacteria. The interaction was analyzed in the presence of ethanol (solvent control) or 1 µM of IAA. As shown in the figure, the IAA enhances the interaction between GST-DPB and His-SKP2A. Arrow indicates the His-SKP2A protein

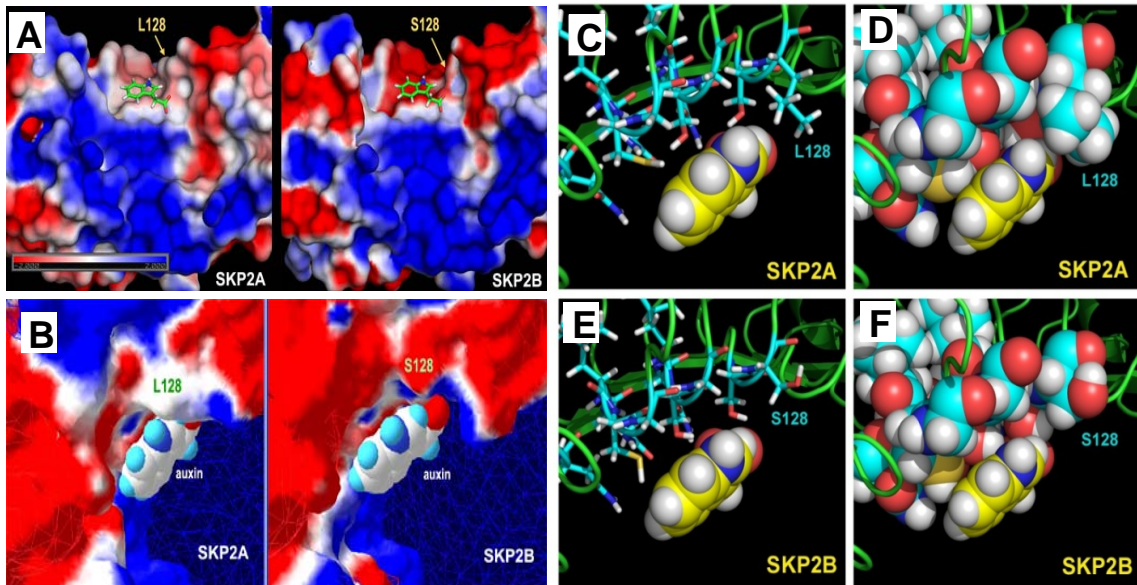

**Supplemental Figure 5. Geometry of auxin at its binding site and steric effect of residue 128.**

**A)** Electrostatic potential of SKP2A and SKP2B. Molecular surface of SKP2A and SKP2B with the PB electrostatic potential mapped onto the surface color-coded from positive  $+2.0$   $kT/e$  (blue) to negative  $-2.0$   $kT/e$  (red). Close-up views of the concave side of the LRR domain with auxin molecule docked shown as a stick model. Arrows point out the surface of residue 128 (leucine in SKP2A or serine in SKP2B). Notice that in SKP2B the non-polar moiety of auxin molecule is surrounded by a negative potential surface that should hinder the binding.

**B)** Steric effect of L128 in SKP2A and S128 in SKP2B on the binding of auxin shown as a CPK model within the protein Coulomb potential environment.

**C, D)** Auxin molecule shown as a CPK model at its binding site in SKP2A with protein residues (cyan frame) participating in the interaction represented as sticks (C) and CPK spheres(D) .

**E, F)** Same representation for SKP2B. Leucine at position 128 in SKP2A makes a “wall” that shapes the pocket. Serine at that position in SKP2B removes this wall and leaves a flatter surface at the binding site.

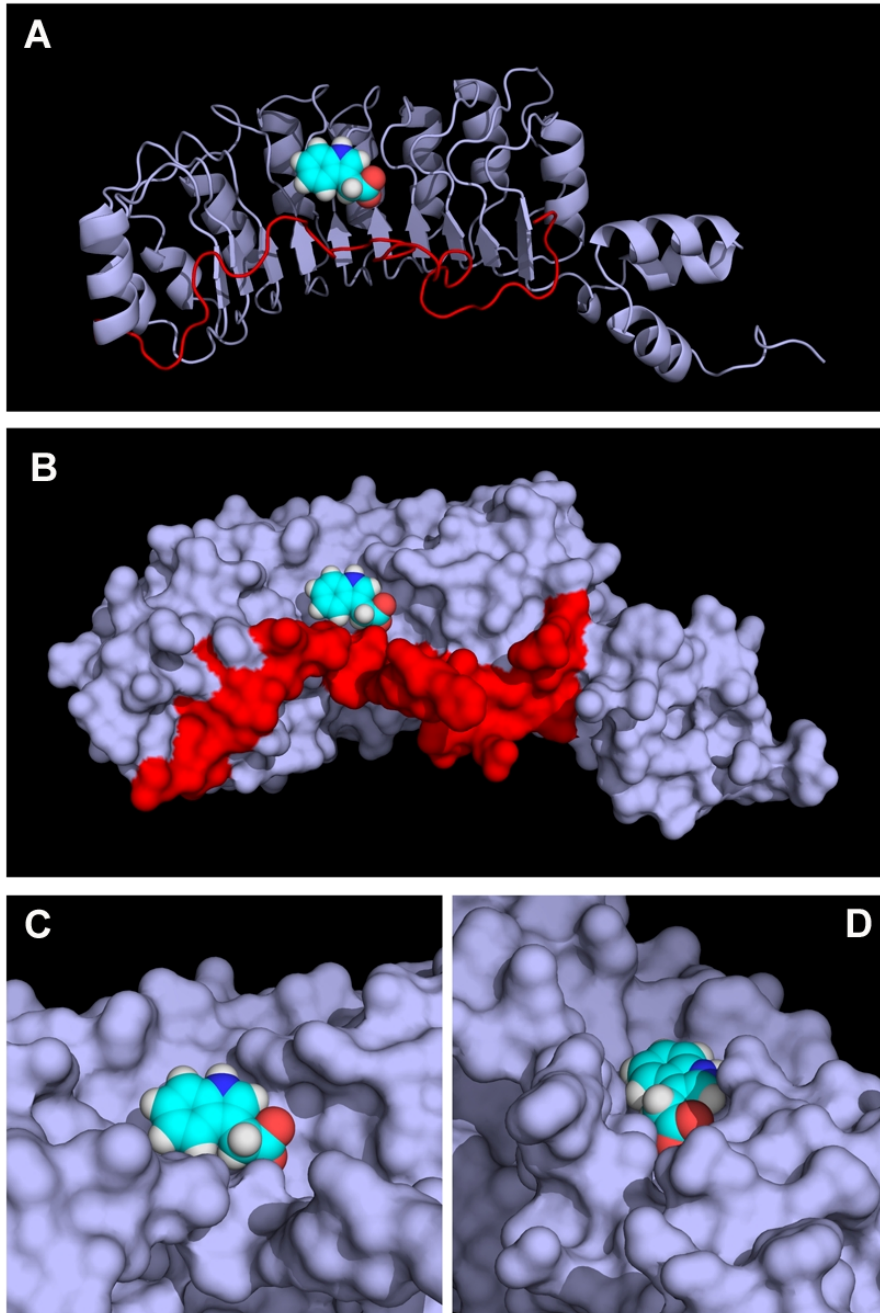

**Supplemental Figure 6. Topography of the auxin binding pocket in complete SKP2A.** **A)** Ribbon diagram of complete SKP2A with auxin shown as a CPK model at its binding site. The C-terminal coil composed of residues 295-332 is colored red. **B)** Surface representation of A. **C,D)** Close-up views of the binding pocket in the surface of complete SKP2A. The inclusion of the C-terminal coil segment adds an inner wall to the concave surface of the LRR solenoid that shapes the auxin binding pocket at its innermost part.

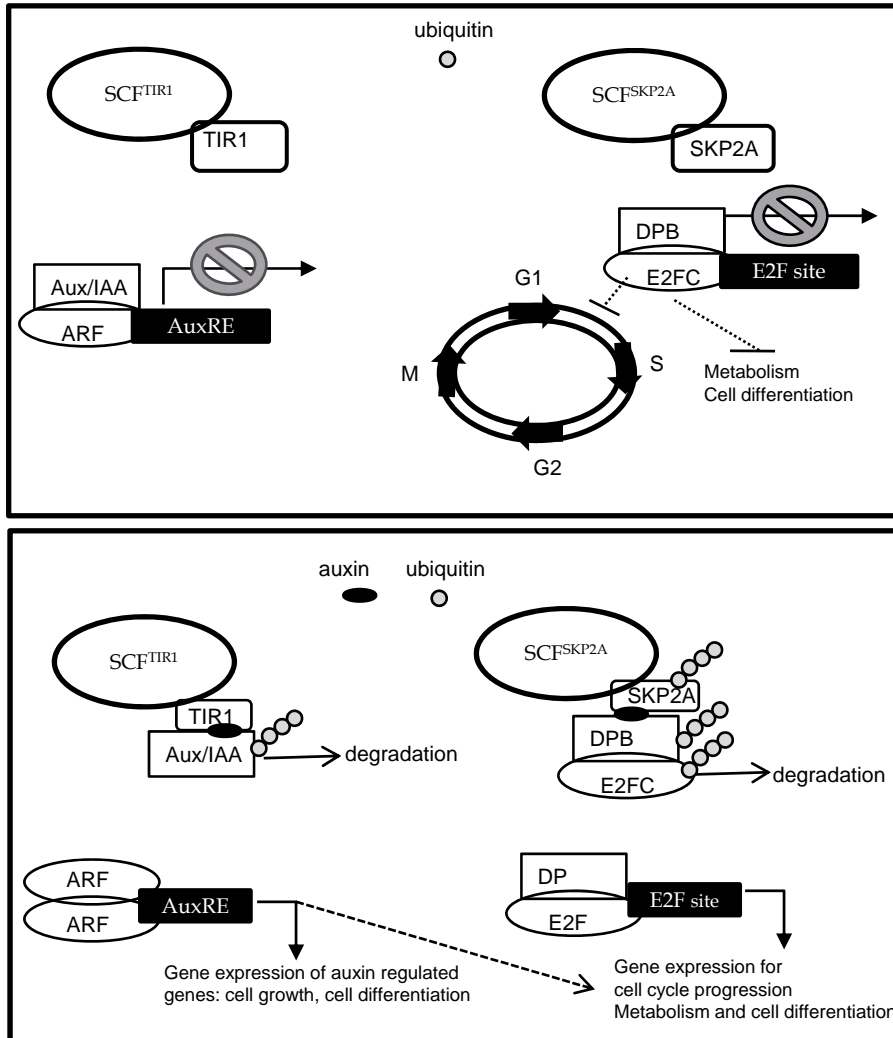

**Supplemental Figure 7: Model of SKP2A-auxin regulation.**

In a low auxin concentration, the SCF<sup>SKP2A</sup> is found inactive. When the level of the hormone increased, auxin activates the SCF<sup>SKP2A</sup> complex (promoting the formation of the complex or activating the E3 ligase activity) and promotes the Aux/IAA degradation by the TIR1, allowing the ARF-mediated gene expression. In this situation, the SCF<sup>SKP2A</sup> ubiquitinates DPB and E2FC, promoting their degradation by the UPS. This will liberate the repression mediated by E2FC-DPB, allowing the activation of cell cycle, metabolism and cell differentiation genes. This, together with the ARF-mediated gene expression, will lead to the cell division and/or cell differentiation. In addition, to limit the over-function of the SCF<sup>SKP2A</sup>, SKP2A is also ubiquitinated and degraded.

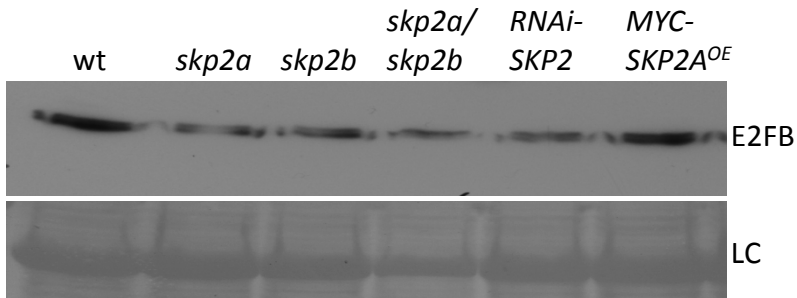

**Supplemental Figure 8. E2FB stability is regulated by neither SKP2A nor SKP2B.** Immunoblotting analyses of wild type (wt), *skp2a* or *skp2b* mutants (Ren et al, 2008), double *skp2a/skp2b* mutant, an RNAi-SKP2 line (Ren et al., 2008) and the overexpressing MYC-SKP2A line (Jurado et al., 2008), using the anti-E2FB IgGs. Total protein as extracted from 6 days old plants in TAP buffer containing proteases inhibitors and 50  $\mu$ M of MG132. The proteins were separated in a SDS-PAGE and transferred to a PVDF membrane, which was analyzed by immunoblotting using IgGs against E2FB (kindly provided by Lieven De Veylder). LC is the loading control, corresponding to the Ponceau stained blot.



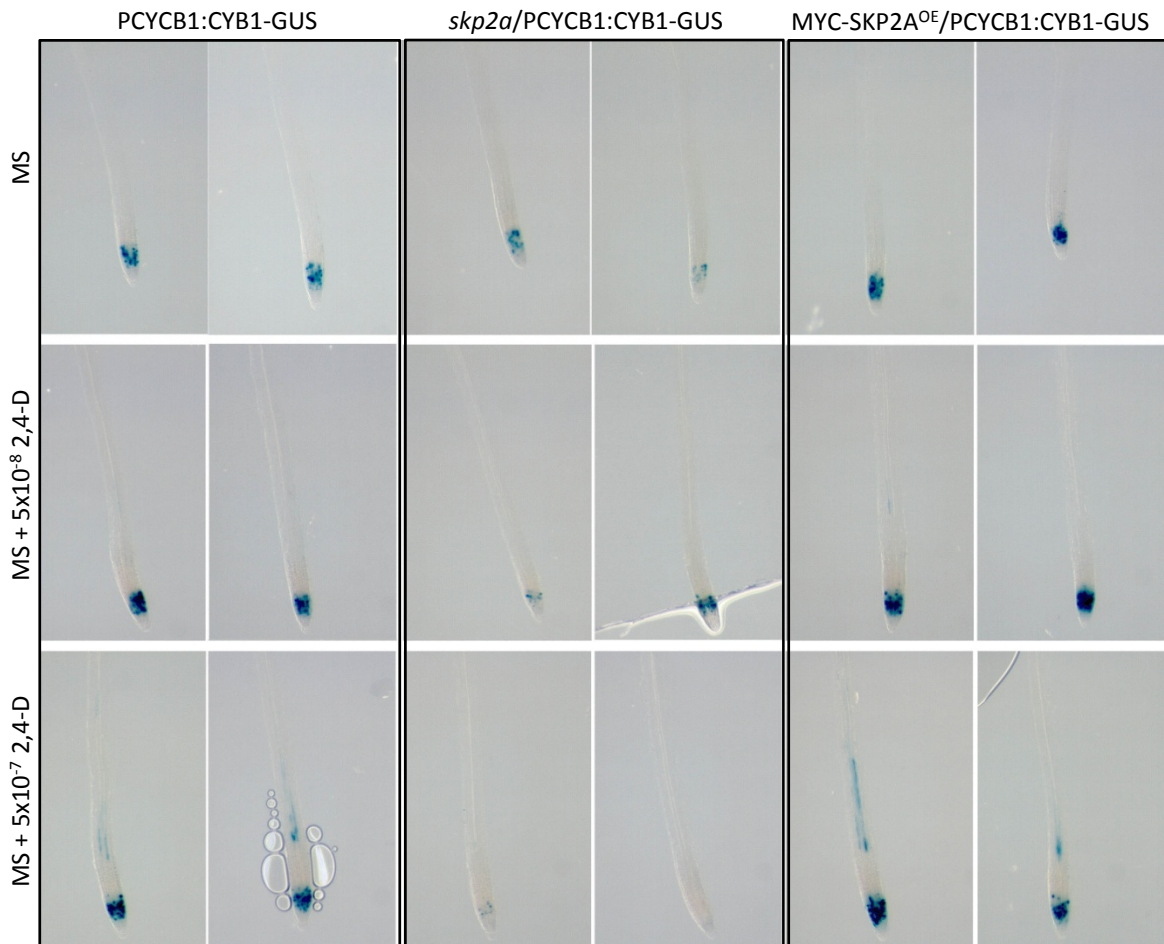

**Supplemental Figure 9. *SKP2A* is necessary to control cell proliferation in response to auxin.**

Five days old seedling carrying the CYCB1;1 degron fused to the GUS protein under the control of the CYCB1;1 promoter (PCYCB1:CYB1-GUS), *skp2a*/PCYCB1:CYB1-GUS or MYC-SKP2A<sup>OE</sup>/PCYCB1:CYB1-GUS seedlings were transferred to MS medium alone or MS medium containing 5x10<sup>-8</sup> M or 5x10<sup>-7</sup> M of 2,4-D for 8 hours. Afterwards, these seedlings were stained for GUS activity. Representative pictures of root meristems of each genotype were chosen.
